# Supplementary material for: Exogenous Cry1Ab/c Protein Recruits Different Endogenous Proteins for Its Function in Plant Growth and Development
Source: PubMed Central journal article supplement (PMC7344169; doi:10.3389/fbioe.2020.00685), 2020-06-30
Supplement: Data_Sheet_1.pdf [file Data_Sheet_1.pdf]

## Supplementary information

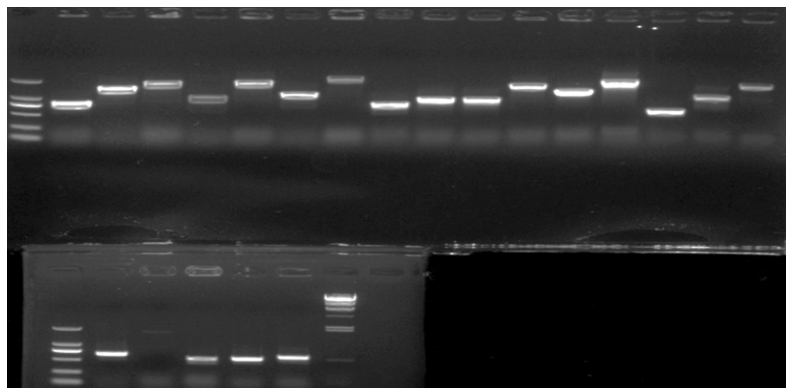

**FIGURE S1** The selected positive insertions from the DH5 $\alpha$  strains were detected by PCR.

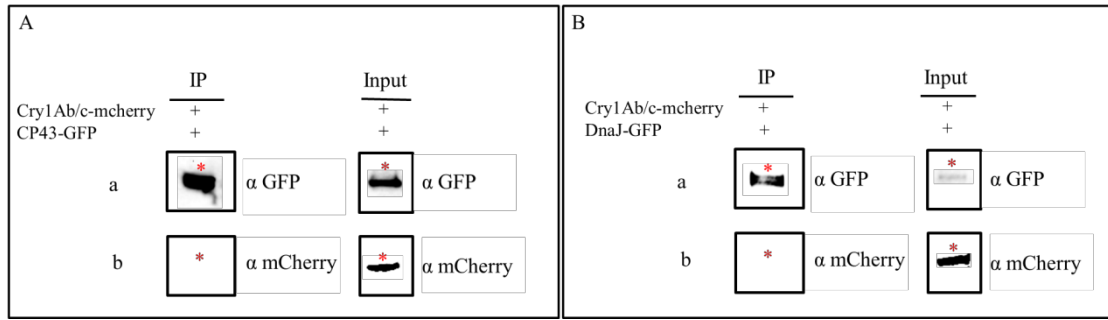

**FIGURE S2** Co-ip was used to verify interaction between Cry1Ab/c and photosynthetic protein CP43 and stress resistance protein DnaJ, respectively. Protein extracts (Input) were immunoprecipitated with GFP-trap beads (IP) and resolved by SDS-PAGE. The immunoblots shown were developed with anti-GFP antibody to detect target endogenous protein (a) and with anti-mCherry antibody to detect Cry1Ab/c (b, 94KD). (A) CP43-GFP+Cry1Ab/c-cherry (36KD); (B) DnaJ-GFP+Cry1Ab/c-cherry (76KD).

**Table S1** Primers for cloning the full-length gene based on subcellular co-localization and co-ip vectors

| Primer name        | Sequences                                         |
|--------------------|---------------------------------------------------|
| 23KD-GFP4-F        | <u>CGGGGTCGACGGATCC</u> ATGGCGTCCACCTCCTGC        |
| 23KD-GFP4-R        | TGCTCACCATGGATCCTGCGACGCTGAAGGAGC                 |
| Trx-GFP4-F         | <u>CGGGGTCGACGGATCC</u> ATGGCCGCCGCCACCA          |
| Trx-GFP4-R         | TGCTCACCATGGATCCATGCTCTTCTATCTTCTTCAGGTCC         |
| THF1-GFP4-F        | <u>CGGGGTCGACGGATCC</u> ATGGCGGCCATATCTTCG        |
| THF1-GFP4-R        | TGCTCACCATGGATCCATGCCTCATGGAATTGAGACT             |
| G-GFP4-F           | <u>CGGGGTCGACGGATCC</u> ATGTTGGGGCATCTGGTTG       |
| G-GFP4-R           | TGCTCACCATGGATCCTACACCCTTAGAACCTGGGAT             |
| PSBP-GFP4-F        | <u>CGGGGTCGACGGATCC</u> ATGGCGTCCACCTCCTGCT       |
| PSBP-GFP4-R        | TGCTCACCATGGATCCTGCGACGCTGAAGGAGCTGGCTGCG         |
| Rubisco-GFP4-F     | <u>CGGGGTCGACGGATCC</u> ATGTCACCACAAACAGAACTAA    |
| Rubisco-GFP4-R     | TGCTCACCATGGATCCGCTATCTAGTTTATCTACCGGC            |
| CP43-GFP4-F        | <u>CGGGGTCGACGGATCC</u> ATGACTCATGCTCCTTTAGGTTCTT |
| CP43-GFP4-R        | TGCTCACCATGGATCCATTAAGAGGGGTCATGGAAA              |
| CAMTAS-GFP4-F      | <u>CGGGGTCGACGGATCC</u> ATGCAGCAGCAGCAAATGG       |
| CAMTAS-GFP4-R      | TGCTCACCATGGATCCGAAATAACCAGGGAGTGGTGTA            |
| DAHP-GFP4-F        | <u>CGGGGTCGACGGATCC</u> ATGGCGCTCGCCACCAA         |
| DAHP-GFP4-R        | TGCTCACCATGGATCCGAAAGCCAATGGGGGCA                 |
| HKMTs-GFP4-F       | <u>CGGGGTCGACGGATCC</u> ATGGAGATGGACACATCGCC      |
| HKMTs-GFP4-R       | TGCTCACCATGGATCCCATGGTTAACTTTCCACCCAT             |
| KIN13A-GFP4-F      | <u>CGGGGTCGACGGATCC</u> ATGGGGGACTCCGGGGA         |
| KIN13A-GFP4-R      | TGCTCACCATGGATCCTCTGGAAGATTTCTTACGGCTG            |
| FREE1-GFP4-F       | <u>CGGGGTCGACGGATCC</u> ATGCATCCCTCCGGTGAGTAC     |
| FREE1-GFP4-R       | TGCTCACCATGGATCCC AAAA ACCA ACTTGACTGGAAC         |
| E3s-GFP4-F         | <u>CGGGGTCGACGGATCC</u> ATGGACAAATCAGAAGAGGATGC   |
| E3s-GFP4-R         | TGCTCACCATGGATCCTGTGGTTTTTCCAATGCCT               |
| DnaJ-GFP4-F        | <u>CGGGGTCGACGGATCC</u> ATGGCGTTGCTACAGTTTGG      |
| DnaJ-GFP4-R        | TGCTCACCATGGATCCTCTCCTGCTGTTTGTGCTGT              |
| Cry1Ab/c-mCherry-F | <u>CGGGGTCGACGGATCC</u> ATGGACA ACTGCAGGCCATAC    |
| Cry1Ab/c-mCherry-R | TGCTCACCATGGATCCTTCAGCCTCGAGTGTTGC                |

For bimolecular fluorescence complementarity vectors, the primer of homologous recombination of the underscore was replaced by CGGGAGATGCGGATCC (Forward primer) and GCTCGCCTGGGGATCC (Reverse primer) with termination codon.
